# Supplementary material
Source: PubMed Central journal article supplement (PMC4121363)
Supplement: epi-9-523-s01.pdf [file epi-9-523-s01.pdf]

## **Supplemental Material to:**

**Matthew Ung, Xiaotu Ma, Kevin C Johnson, Brock C Christensen, and Chao Cheng**

**Effect of estrogen receptor  $\alpha$  binding on functional DNA methylation in breast cancer**

**Epigenetics 2014; 9(4)**

**<http://dx.doi.org/10.4161/epi.27688>**

**[http://www.landesbioscience.com/journals/epigenetics/  
article/27688/](http://www.landesbioscience.com/journals/epigenetics/article/27688/)**

**[http://www.landesbioscience.com/journals/epigenetics/  
article/27688/2013EPI0356R\\_ST1.xls](http://www.landesbioscience.com/journals/epigenetics/article/27688/2013EPI0356R_ST1.xls)**
